# Supplementary material
Source: Springer Nature journal article supplement (https://www.springermedizin.de/resource/supplementary/12974_2009_206_MOESM2_ESM.pdf/9600994)

**CYTOKINES**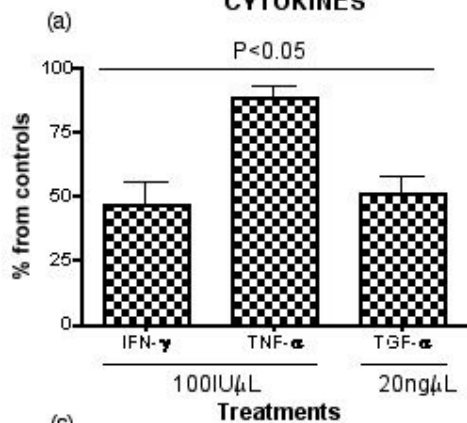**QUINOLINIC ACID**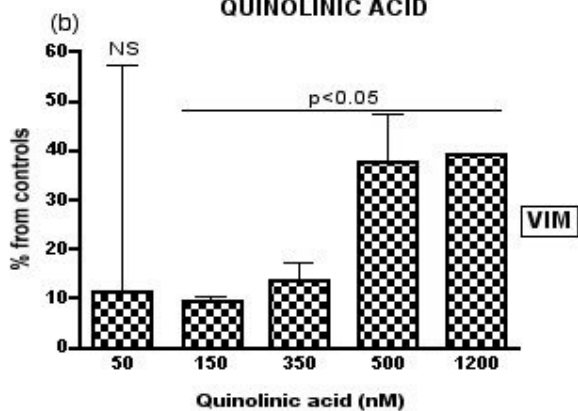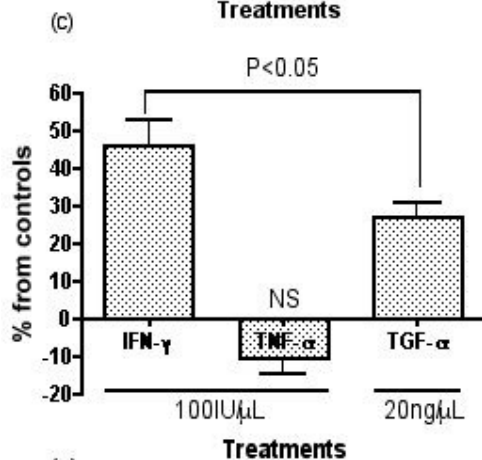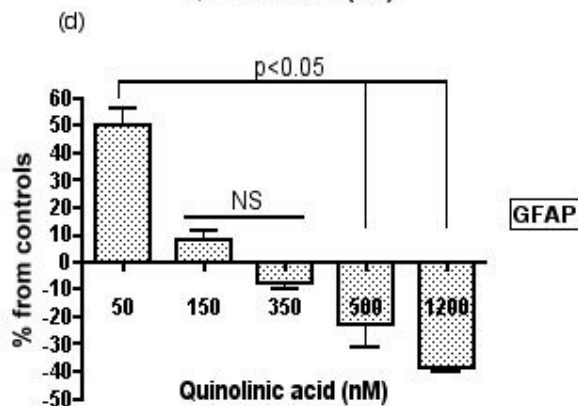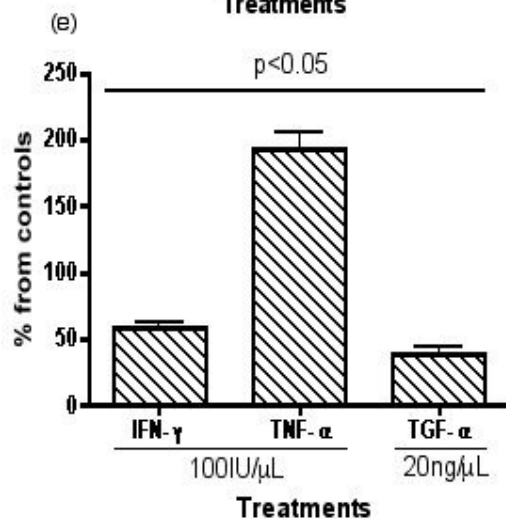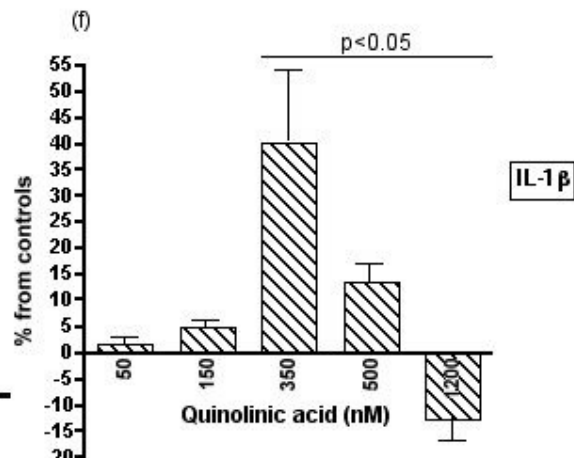

Supplement: MOESM2 [file 9600994]
